# Supplementary material for: A Novel Technique of Amniotic Membrane Preparation Mimicking Limbal Epithelial Crypts Enhances the Number of Progenitor Cells upon Expansion
Source: MDPI journal article supplement (doi:10.3390/cells12050738), 2023-02-24
Supplement: s1 [file s1]

## Supplementary information

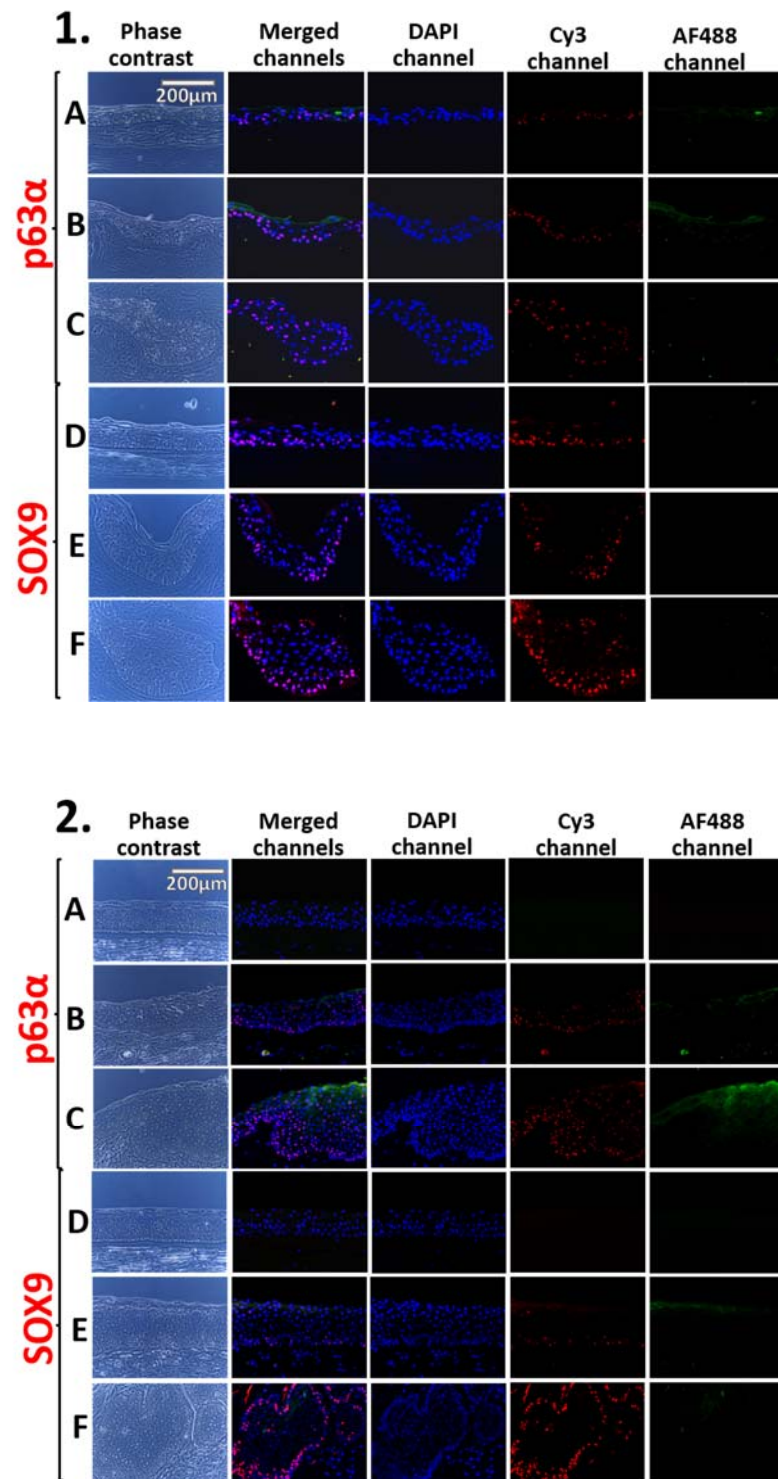

**Figure S1.** The p63 $\alpha$  and SOX9 marker staining of the expanded limbal epithelial tissue on the human amniotic membrane (HAM) *ex vivo* (1. A-F) and corneal-limbal tissue *in situ* (2. A-F). Phase contrast (the first row to the left) images, as well as images of the merged and individual channels of the fluorescence immunohistochemistry (right) are presented.

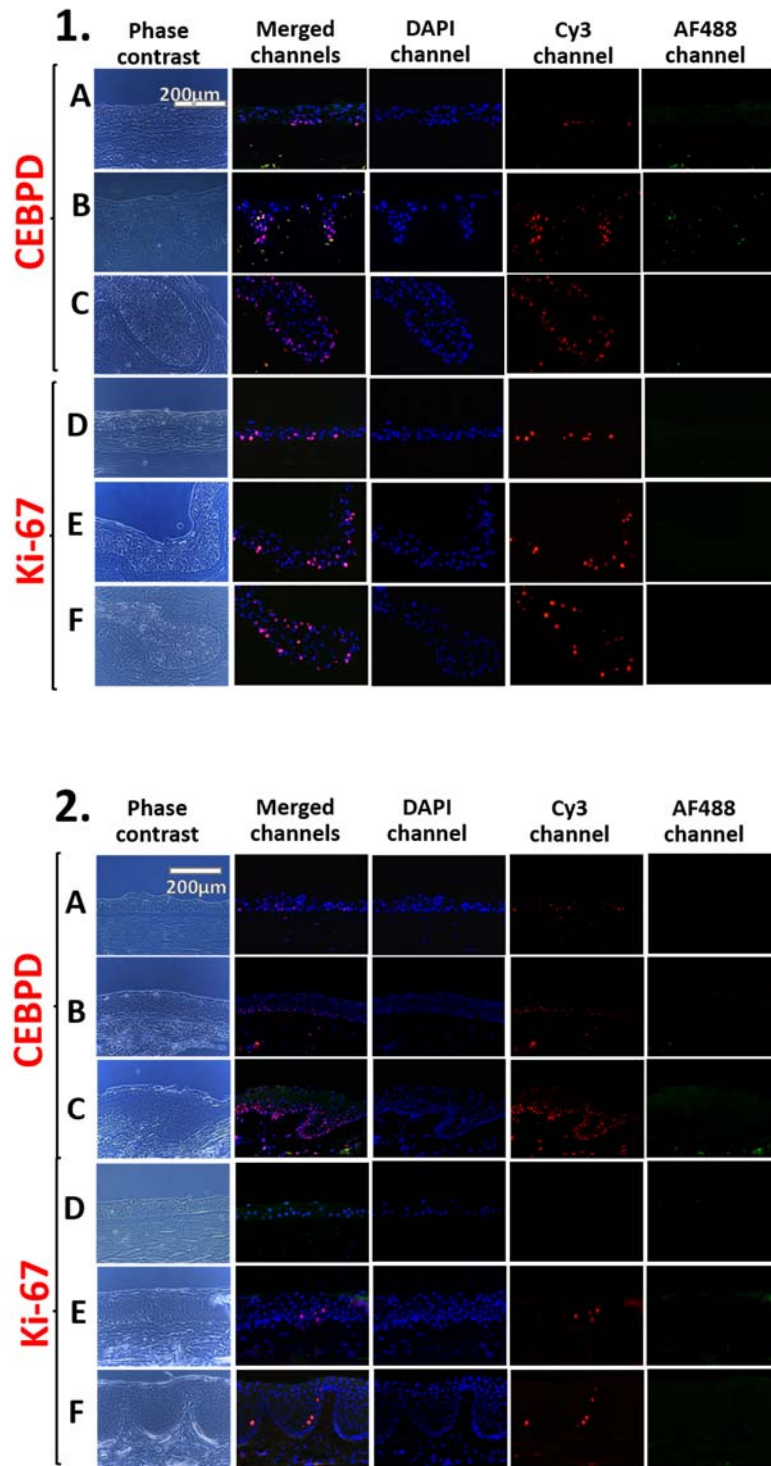

**Figure S2.** The CEBPD and Ki-67 marker staining of the expanded limbal epithelial tissue on the human amniotic membrane (HAM) *ex vivo* (**1. A-F**) and corneal-limbal tissue *in situ* (**2. A-F**). Phase contrast (the first row to the left) images, as well as images of the merged and individual channels of the fluorescence immunohistochemistry (right) are presented.

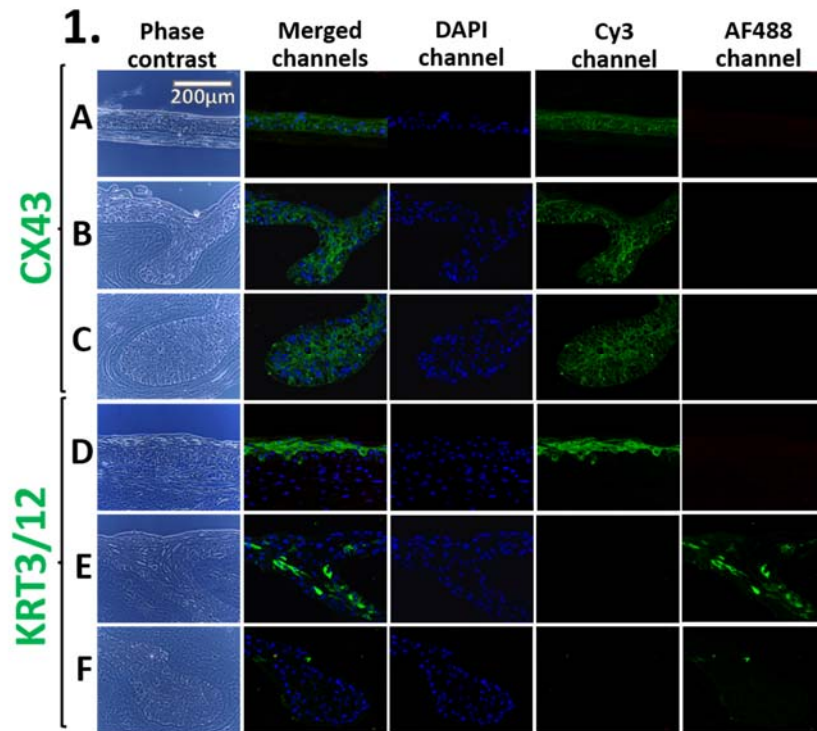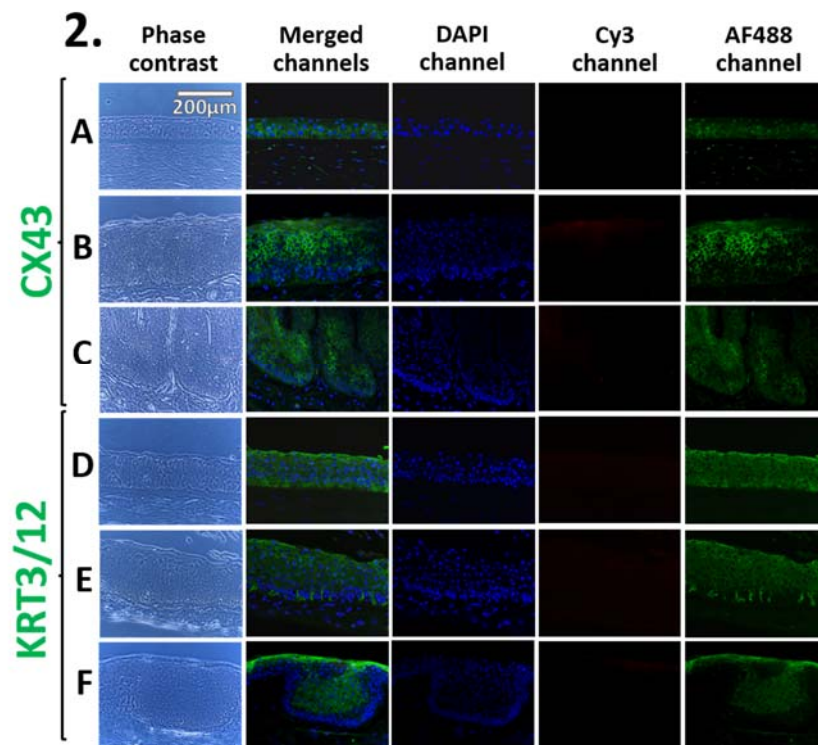

**Figure S3.** The CX43 and KRT3/12 marker staining of the expanded limbal epithelial tissue on the human amniotic membrane (HAM) *ex vivo* (1. A-F) and corneal-limbal tissue *in situ* (2. A-F). Phase contrast (the first row to the left) images, as well as images of the merged and individual channels of the fluorescence immunohistochemistry (right) are presented.

**Table S1.** List of primary and secondary antibodies used for immunohistochemistry

| Primary antibody                       | Symbol       | Reference | Company          | Host   | Dilution | Clonality  |
|----------------------------------------|--------------|-----------|------------------|--------|----------|------------|
| Tumor protein 63 alpha                 | p63 $\alpha$ | 4892S     | Cell Signalling  | Rabbit | 1:200    | Polyclonal |
| Proliferation marker Ki-67             | Ki-67        | RM-9106-S | ThermoScientific | Rabbit | 1:200    | Monoclonal |
| CCAAT/enhancer-binding protein delta   | CEBPD        | Ab198320  | Abcam            | Rabbit | 1:200    | Polyclonal |
| SRY-Box Transcription Factor 9         | SOX9         | 82630     | Cell Signalling  | Rabbit | 1: 200   | Monoclonal |
| Connexin 43                            | Cx43         | C6219     | Sigma Aldrich    | Rabbit | 1: 1000  | Polyclonal |
| Cytokeratin 3/12                       | KRT3/12      | 08691431  | MP biomedical    | Mouse  | 1:100    | Monoclonal |
| Secondary antibody                     | Symbol       | Reference | Company          | Host   | Dilution | Clonality  |
| Alexa Fluor® 488 donkey anti-mouseIgG  |              | A21202    | Abcam            | Mouse  | 1:500    | Monoclonal |
| Alexa Fluor® 488 donkey anti-rabbitIgG |              | A21206    | Abcam            | Rabbit | 1:500    | Monoclonal |
| Cy3® goat anti-rabbit IgG              |              | A10520    | Abcam            | Rabbit | 1:500    | Monoclonal |
